# Supplementary material for: Amyloid-like assembly converting commercial proteins to water-insoluble adsorbents with ultrahigh adsorption capacity and excellent antifouling property for uranium extraction
Source: Royal Society of Chemistry journal article supplement (doi:10.1039/d1ta08174h), 2021-12-07
Supplement: d1ta08174h1.pdf [file d1ta08174h1.pdf]

## Supporting Information

### **Amyloid-Like Assembly Converting Commercial Proteins to Water-Insoluble Adsorbents with Ultrahigh Adsorption Capacity and Ultrafast Adsorption Rate for Uranium Extraction**

*Hao Ye<sup>a</sup>, Ming-Bang Wu<sup>a\*</sup>, Lu-Lin Ma<sup>a</sup>, Shi-Cheng Liu<sup>a</sup>, Yu Zhong<sup>a</sup>, Juming Yao<sup>a,b</sup>*

*<sup>a</sup>School of Materials Science and Engineering, Zhejiang Sci-Tech University, 928 Second Avenue, Xiasha Higher Education Park, Hangzhou 310018, China Hangzhou 310018, China*

*<sup>b</sup>School of Materials Science and Chemical Engineering, Ningbo University, 818 Fenghua Road, Ningbo 315211, China*

*E-mails: wumingbang@zstu.edu.cn (M.-B. Wu),*

## **Molecular dynamics simulations:**

**Structure optimization of BSA:** All-atom crystal structure of BSA analyzed by Bujacz et al. was obtained from RCSB Protein Data Bank [S1-2]. The coordinates of co-crystallized water molecules were deleted before simulations and the disulfide bonds of BSA were broken to adapt to the role of TCEP. First, BSA was solvated in a rectangular box ( $160 \times 81 \times 108 \text{ \AA}^3$ ) using the SPC/E water model [S3] and neutralized by sodium cations. The conjugate gradient method [S4-5] was used to pre-equalize the system for eliminating the excessive stress in initial structures. After energy minimization, a 300 ps position-restrained NPT process was performed to relax the solvent around the protein at 298 K, during which the temperature and pressure coupling were performed using a v-rescale thermostat [S6] and Berendsen barostat [S7]. A 200 ns production simulation was then performed under NPT ensemble with Parrinello-Rahman barostat [S8].

**Simulated ions adsorption:** BSA and counterions were extracted from the as-equilibrated box and placed in the center of an empty rectangular box ( $200 \times 100 \times 150 \text{ \AA}^3$ ). Then 38  $\text{Na}^+$ , 70  $\text{UO}_2^{2+}$ , 70  $\text{Fe}^{3+}$ , 70  $\text{Mg}^{2+}$ , 70  $\text{Cu}^{2+}$ , 70  $\text{Co}^{2+}$ , 70  $\text{Zn}^{2+}$ , 140  $\text{NO}_3^-$ , 808  $\text{Cl}^-$ , and 40000 water molecules were randomly placed in the box using Packmol program [S9] for providing homogeneous electrolyte solution. The parameters of energy minimization, position-restrained simulation, and production simulation are the same as described above.

During simulations, three-dimensional periodic boundary conditions (PBC) were used to avoid the influence of the box boundary during simulations. The cut-off distance of non-bonded interactions is  $13 \text{ \AA}$  and the long-range electrostatic interactions were calculated by the particle-mesh Ewald (PME) method [S10]. All simulations were based on Amber99sb-ildn force field [S11] and carried out by using the GROMACS 2018.6 software package [S12]. Parameters of  $\text{UO}_2^{2+}$  and  $\text{NO}_3^-$  were taken from Shenoy et al.

[S13], while other metal cations and anions were based on Merz's parameters [S14-16]. All visualization structures are provided by VMD 1.9.3 software [S17]. Radial distribution functions (RDF)  $g(r)_{A-B}$  defined by equation S1:

$$g(r)_{A-B} = \frac{1}{\langle \rho_B \rangle} \frac{1}{N_A} \sum_{i=1}^{N_A} \sum_{j=1}^{N_B} \frac{\delta(r_{ij} - r)}{4\pi r^2}$$

was utilized to calculate the coordination number of  $\text{UO}_2^{2+}$ , with  $\langle \rho_B \rangle$  the particle density of type B averaged over all spheres around particles A. Notably, RDF calculated in this work is between the center of mass of  $\text{UO}_2^{2+}$  (B in the equation) and van der Waals surface of BSA (A in equation).

**Table S1.** Comparison of adsorption performances with other state-of-the-art adsorbents.

| Adsorbent             | Adsorption capacity (mg/g) | Equilibrium time | Conditions                                        | Ref.      |
|-----------------------|----------------------------|------------------|---------------------------------------------------|-----------|
| BSA-TCEP              | 1064                       | 2 h              | V = 2 L, m = 5 mg, FR = 1 L/h                     | This work |
| PIDO NF               | 951                        | 550 min          | V = 5 L, m = 15 mg, FR = 5 L/min                  | 18        |
| MS@PIDO/Alg           | 539.19                     | 24 h             | V = 5 L, m = 60 mg, FR = 5 L/min                  | 19        |
| AO-HNTs               | 295.66                     | 13 h             | V = 1 L, m = 10 mg, FR = 1 L/h, T = 25 °C, pH = 8 | 20        |
| SSUP fiber            | 12.51                      | 30 min           | V = 30 mL, m = 10 mg                              | 21        |
| PAO hydrogel          | 718                        | 600 h            | V = 1 L, m = 10 mg                                | 22        |
| CP-PAO                | 350                        | 160 h            | V = 2 L, m = 10 mg                                | 23        |
| PPA@MISS-PAF-1        | 307.3                      | 60 min           |                                                   | 24        |
| SMON-PAO fibers       | 1158.16                    | 30 h             | V = 5 L, m = 10 mg                                | 25        |
| UiO-66-3C4N           | 200                        | 8 h              | V = 1 L, m = 5 mg, pH = 8                         | 26        |
| H-ABP fiber           | 302                        | 24 h             | V = 1 L, m = 20 mg, pH = 8                        | 27        |
| UiO-66                | 340                        | 14 h             | V = 1 L, m = 10 mg, pH = 6                        | 28        |
| Zn <sup>2+</sup> /PAO | 664                        | 36 h             | V = 2 L, m = 10 mg                                | 29        |
| RGO/PDA/oxime         | 605                        | 6 h              | V = 500 mL, m = 5 mg, T = 25 °C, pH = 5           | 30        |

V is the volume of the solution; m is the mass of the adsorbents; FR is flow rate; T is the temperature.

**Table S2.** Parameters of Pseudo-first-order and Pseudo-second-order adsorption kinetics for BSA-based adsorbents.

| Concentration | Pseudo-second-order model |                |                           | Pseudo-first-order model |                |                                     |
|---------------|---------------------------|----------------|---------------------------|--------------------------|----------------|-------------------------------------|
|               | R <sup>2</sup>            | q <sub>e</sub> | k <sub>2</sub> (g/mg/min) | R <sup>2</sup>           | q <sub>e</sub> | k <sub>1</sub> (min <sup>-1</sup> ) |
| 1 ppm         | 0.99509                   | 314.47         | 7.2 × 10 <sup>-4</sup>    | 0.92283                  | 310.77         | 0.065                               |
| 4 ppm         | 0.99975                   | 671.14         | 4.68 × 10 <sup>-4</sup>   | 0.90125                  | 608.94         | 0.4521                              |
| 8 ppm         | 0.99928                   | 1074.61        | 1.18 × 10 <sup>-4</sup>   | 0.84129                  | 907.27         | 0.3112                              |
| 16 ppm        | 0.98949                   | 2036.37        | 1.25 × 10 <sup>-5</sup>   | 0.9385                   | 1727           | 0.0195                              |

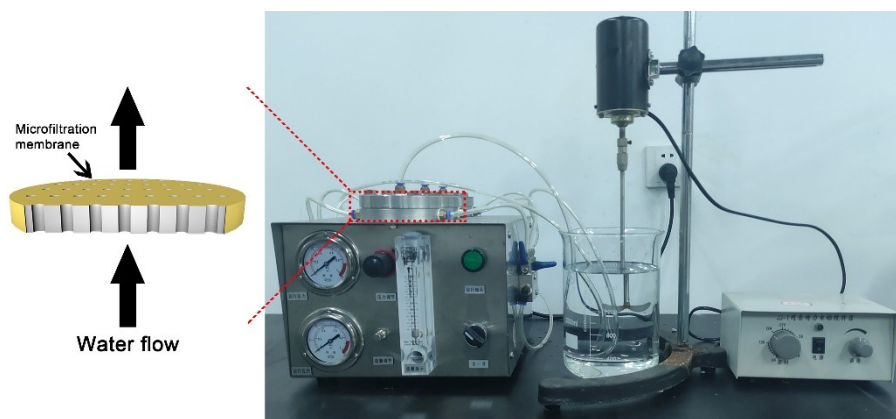

**Fig. S1** Self-made flow system for testing adsorption performance.

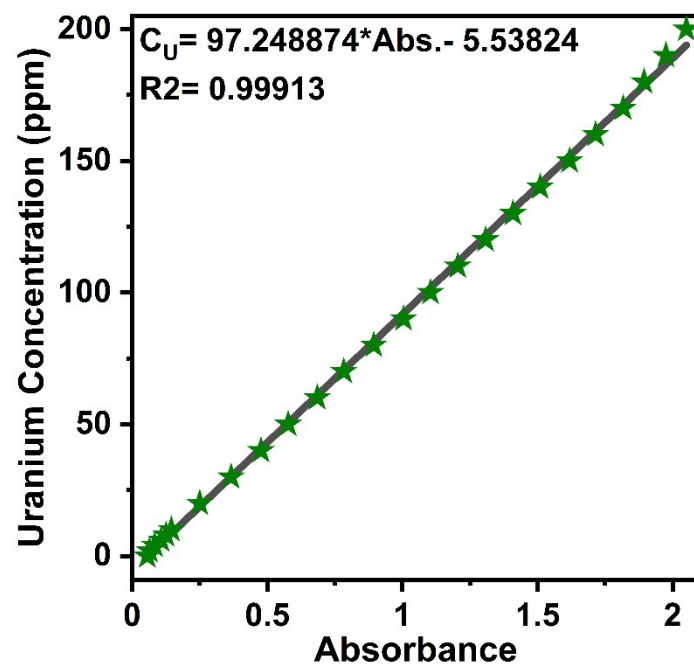

**Fig. S2** The curvilinear regression between uranium concentration and absorbance.

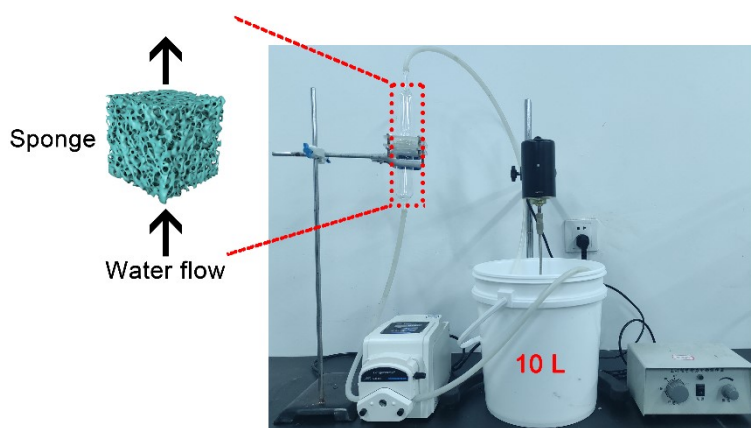

**Fig. S3** Self-made circulating water flow system for dynamic adsorption.

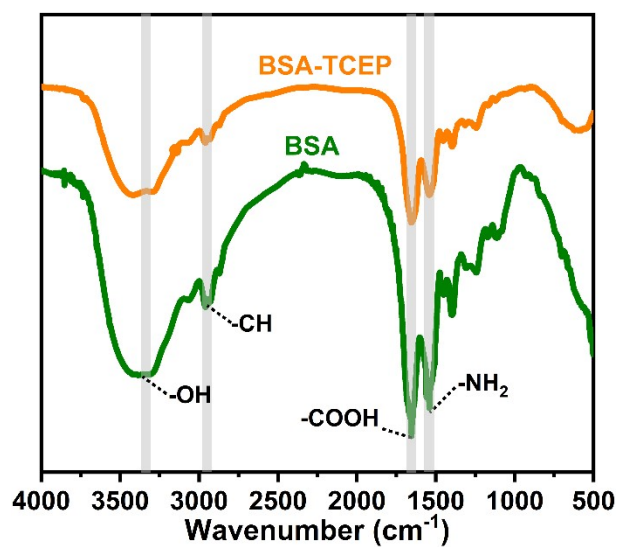

Fig. S4 FT-IR spectra of pristine BSA and BSA-based adsorbents.

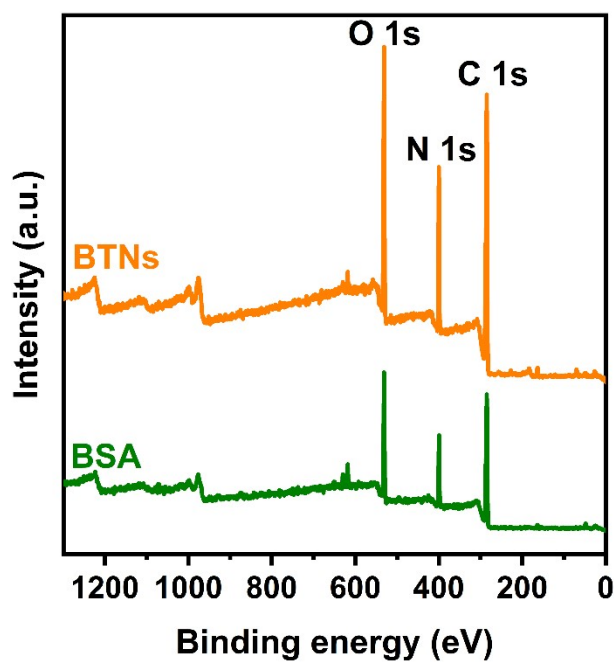

Fig. S5 XPS spectra of pristine BSA and BSA-based adsorbents.

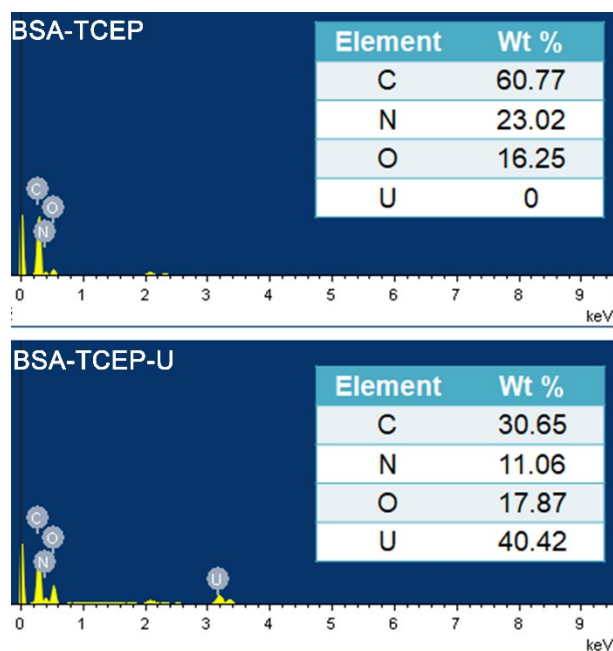

**Fig. S6** EDS results of the adsorbents before and after adsorption.

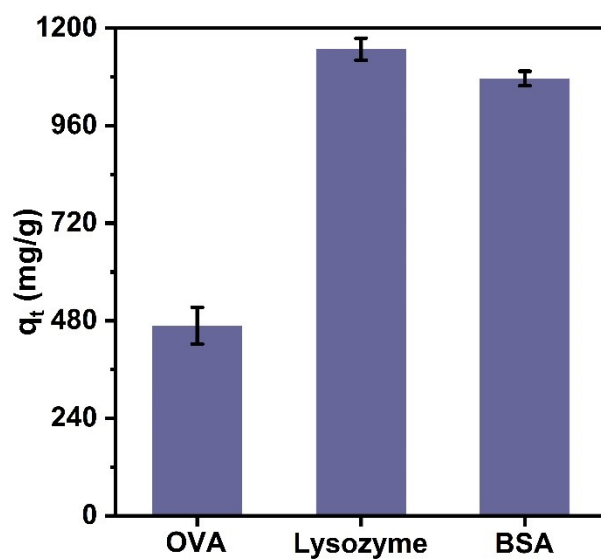

**Fig. S7** Adsorption capacity the protein-based adsorbents prepared by different proteins.

The initial concentration of uranium is 8 ppm.



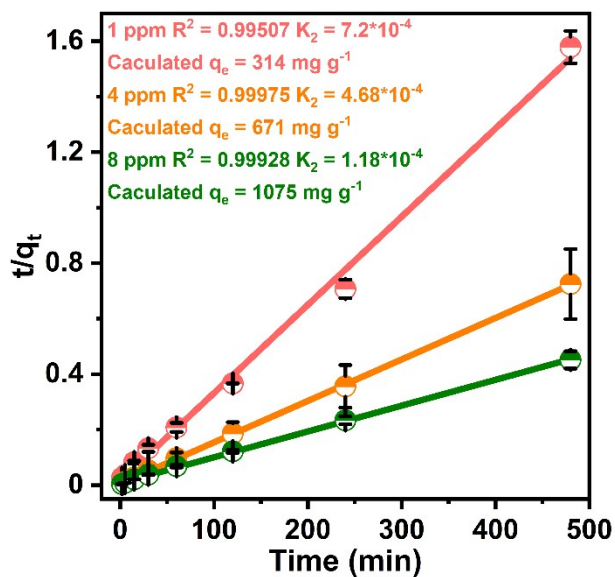

**Fig. S8** Plots of  $t/q_t$  as a function of reaction time, showing the reactions followed by pseudo-second-order kinetic model.

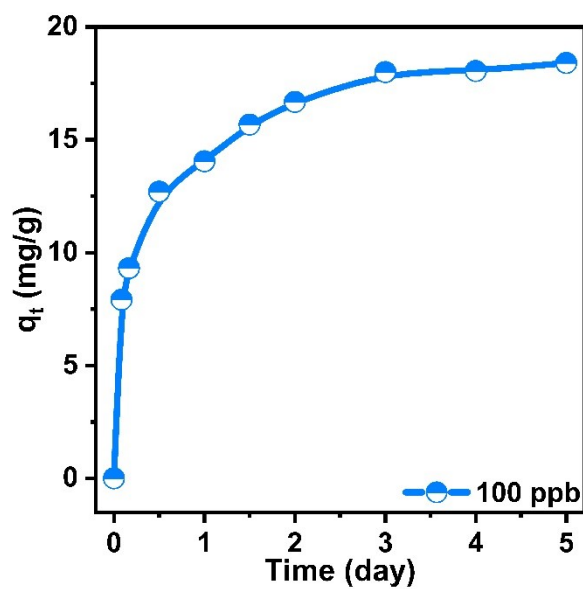

**Fig. S9** The kinetics of uranium adsorption with an initial concentration of 100 ppb.

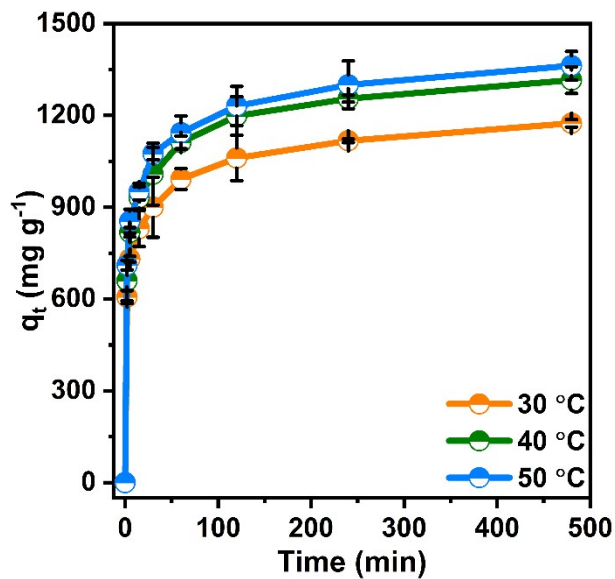

**Fig. S10** Adsorption capacity of the adsorbents at different temperatures. The initial concentration of uranium is 8 ppm.

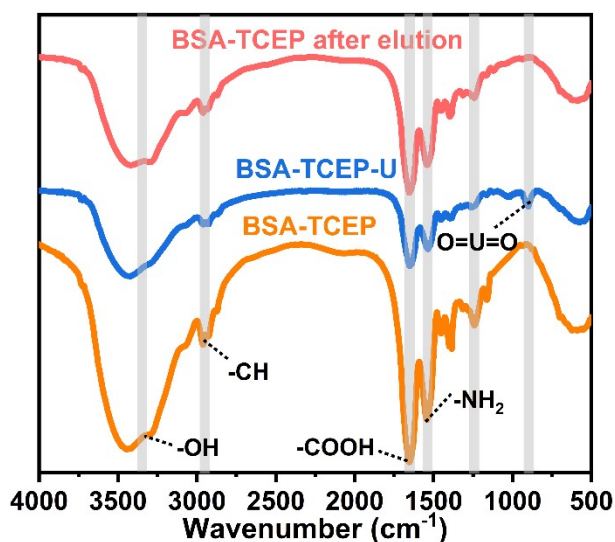

**Fig. S11** FT-IR spectra of the adsorbents before adsorption, after adsorption and after desorption, respectively.

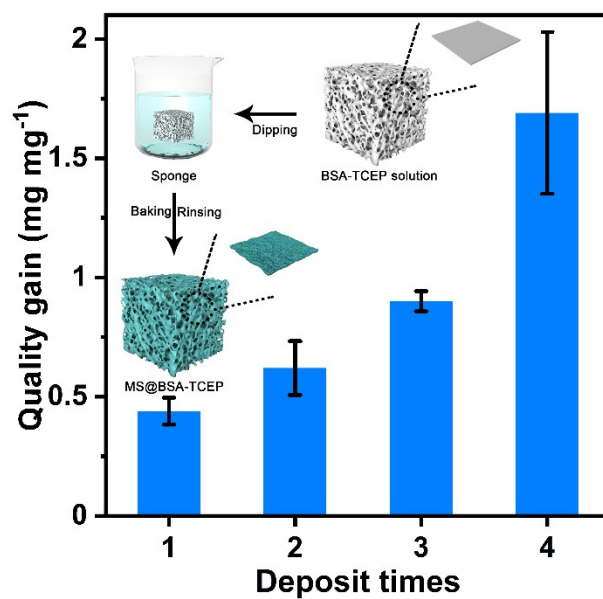

**Fig. S12** Mass changes of modified sponges with different deposition times.

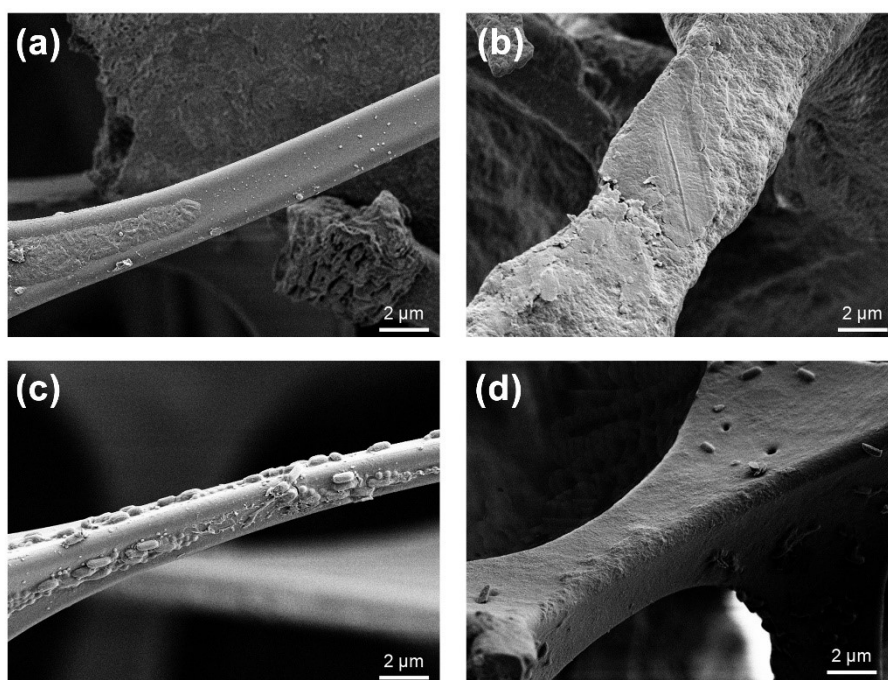

**Fig. S13** SEM images of MS (a) without and (a) with BSA coatings after contacting with *Escherichia coli*, respectively. SEM images of MS (c) without and (d) with BSA coatings after contacting with *Staphylococcus aureus*, respectively.

## References

- [S1] A. Bujacz, Structures of bovine, equine and leporine serum albumin, *Acta Crystallographica Section D*, 68 (2012) 1278-1289.
- [S2] B.G. Bujacz A., Crystal Structure of Bovine Serum Albumin, doi: 10.2210/pdb4F5S/pdb, (2012).
- [S3] H.J.C. Berendsen, J.R. Grigera, T.P. Straatsma, The missing term in effective pair potentials, *The Journal of Physical Chemistry*, 91 (1987) 6269-6271.
- [S4] K. Zimmermann, ORAL: All purpose molecular mechanics simulator and energy minimizer, 12 (1991) 310-319.
- [S5] M.C. Payne, M.P. Teter, D.C. Allan, T.A. Arias, J.D. Joannopoulos, Iterative minimization techniques for ab initio total-energy calculations: molecular dynamics and conjugate gradients, *Rev. Mod. Phys.*, 64 (1992) 1045-1097.
- [S6] G. Bussi, D. Donadio, M. Parrinello, Canonical sampling through velocity rescaling, *J. Chem. Phys.*, 126 (2007) 014101.
- [S7] H.J.C. Berendsen, J.P.M. Postma, W.F. van Gunsteren, A. DiNola, J.R. Haak, Molecular dynamics with coupling to an external bath, *J. Chem. Phys.*, 81 (1984) 3684-3690.
- [S8] M. Parrinello, A. Rahman, Polymorphic transitions in single crystals: A new molecular dynamics method, *J. Appl. Phys.*, 52 (1981) 7182-7190.
- [S9] L. Martínez, R. Andrade, E.G. Birgin, J.M. Martínez, PACKMOL: A package for building initial configurations for molecular dynamics simulations, *J. Comput. Chem.*, 30 (2009) 2157-2164.
- [S10] T. Darden, D. York, L. Pedersen, Particle mesh Ewald: An  $N \cdot \log(N)$  method for Ewald sums in large systems, *J. Chem. Phys.*, 98 (1993) 10089-10092.
- [S11] K. Lindorff-Larsen, S. Piana, K. Palmo, P. Maragakis, J.L. Klepeis, R.O. Dror, D.E. Shaw, Improved side-chain torsion potentials for the Amber ff99SB protein force field, *Proteins: Struct., Funct., Bioinf.*, 78 (2010) 1950-1958.
- [S12] M.J. Abraham, T. Murtola, R. Schulz, S. Páll, J.C. Smith, B. Hess, E. Lindahl, GROMACS: High performance molecular simulations through multi-level parallelism from laptops to supercomputers, *SoftwareX*, 1-2 (2015) 19-25.
- [S13] P. Sahu, S.M. Ali, K.T. Shenoy, Passage of TBP–uranyl complexes from aqueous–organic interface to the organic phase: insights from molecular dynamics simulation, *Phys. Chem. Chem. Phys.*, 18 (2016) 23769-23784.
- [S14] P. Li, L.F. Song, K.M. Merz, Systematic Parameterization of Monovalent Ions Employing the Nonbonded Model, *J. Chem. Theory Comput.*, 11 (2015) 1645-1657.
- [S15] P. Li, B.P. Roberts, D.K. Chakravorty, K.M. Merz, Rational Design of Particle Mesh Ewald Compatible Lennard-Jones Parameters for +2 Metal Cations in Explicit Solvent, *J. Chem. Theory Comput.*, 9 (2013) 2733-2748.
- [S16] P. Li, L.F. Song, K.M. Merz, Parameterization of Highly Charged Metal Ions Using the 12-6-4 LJ-Type Nonbonded Model in Explicit Water, *J. Phys. Chem. B*, 119 (2015) 883-895.

- [S17] W. Humphrey, A. Dalke, K. Schulten, VMD: Visual molecular dynamics, *J. Mol. Graph.*, 14 (1996) 33-38.
- [S18] D. Wang, J. Song, J. Wen, Y. Yuan, Z. Liu, S. Lin, H. Wang, H. Wang, S. Zhao, X. Zhao, M. Fang, M. Lei, B. Li, N. Wang, X. Wang and H. Wu, *Advanced Energy Materials*, 2018, **8**, 1802607.
- [S19] D. Wang, J. Song, S. Lin, J. Wen, C. Ma, Y. Yuan, M. Lei, X. Wang, N. Wang and H. Wu, *Advanced Functional Materials*, 2019, **29**, 1901009.
- [S20] S. Zhao, Y. Yuan, Q. Yu, B. Niu, J. Liao, Z. Guo and N. Wang, *Angewandte Chemie International Edition*, 2019, **58**, 14979-14985.
- [S21] Y. Yuan, Q. Yu, J. Wen, C. Li, Z. Guo, X. Wang and N. Wang, *Angewandte Chemie International Edition*, 2019, **58**, 11785-11790.
- [S22] C. Ma, J. Gao, D. Wang, Y. Yuan, J. Wen, B. Yan, S. Zhao, X. Zhao, Y. Sun, X. Wang and N. Wang, *Advanced Science*, 2019, **6**, 1900085.
- [S23] J. Gao, Y. Yuan, Q. Yu, B. Yan, Y. Qian, J. Wen, C. Ma, S. Jiang, X. Wang and N. Wang, *Chemical Communications*, 2020, **56**, 3935-3938.
- [S24] Z. Wang, Q. Meng, R. Ma, Z. Wang, Y. Yang, H. Sha, X. Ma, X. Ruan, X. Zou, Y. Yuan and G. Zhu, *Chem*, 2020, **6**, 1683-1691.
- [S25] Y. Yuan, S. Zhao, J. Wen, D. Wang, X. Guo, L. Xu, X. Wang and N. Wang, *Advanced Functional Materials*, 2019, **29**, 1805380.
- [S26] Y. H. Yuan, S. W. Feng, L. J. Feng, Q. H. Yu, T. T. Liu and N. Wang, *Angew. Chem.-Int. Edit.*, 2020, **59**, 4262-4268.
- [S27] X. Xu, H. Zhang, J. Ao, L. Xu, X. Liu, X. Guo, J. Li, L. Zhang, Q. Li, X. Zhao, B. Ye, D. Wang, F. Shen and H. Ma, *Energy & Environmental Science*, 2019, **12**, 1979-1988.
- [S28] Q. Yu, Y. Yuan, J. Wen, X. Zhao, S. Zhao, D. Wang, C. Li, X. Wang and N. Wang, *Advanced Science*, 2019, **6**, 1900002.
- [S29] B. Yan, C. Ma, J. Gao, Y. Yuan and N. Wang, *Advanced Materials*, 2020, **32**, 1906615.
- [S30] Y. Qian, Y. Yuan, H. Wang, H. Liu, J. Zhang, S. Shi, Z. Guo and N. Wang, *Journal of Materials Chemistry A*, 2018, **6**, 24676-24685.
